# Supplementary material for: Negative regulation of miR-145 by C/EBP-β through the Akt pathway in cancer cells
Source: PubMed Central journal article supplement — Nucleic Acids Res. 2012 Apr 11;40(14):6683–92. doi: 10.1093/nar/gks324 (PMC3413133; doi:10.1093/nar/gks324), 2012-04-11
Supplement: supp_gks324_nar-00566-a-2012-File009.pdf [file supp_gks324_nar-00566-a-2012-File009.pdf]

A

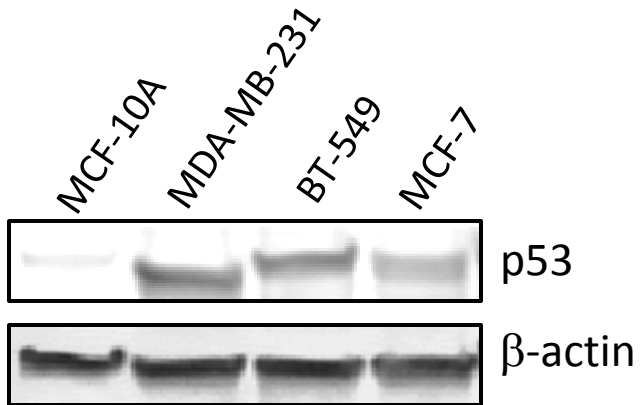

B

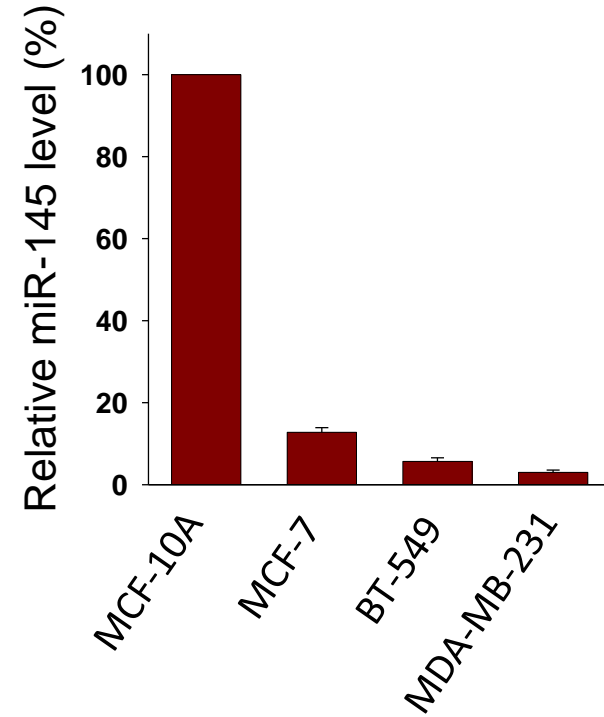

S-Fig. 1 Detection of basal levels of p53 and miR-145 in 4 cell lines

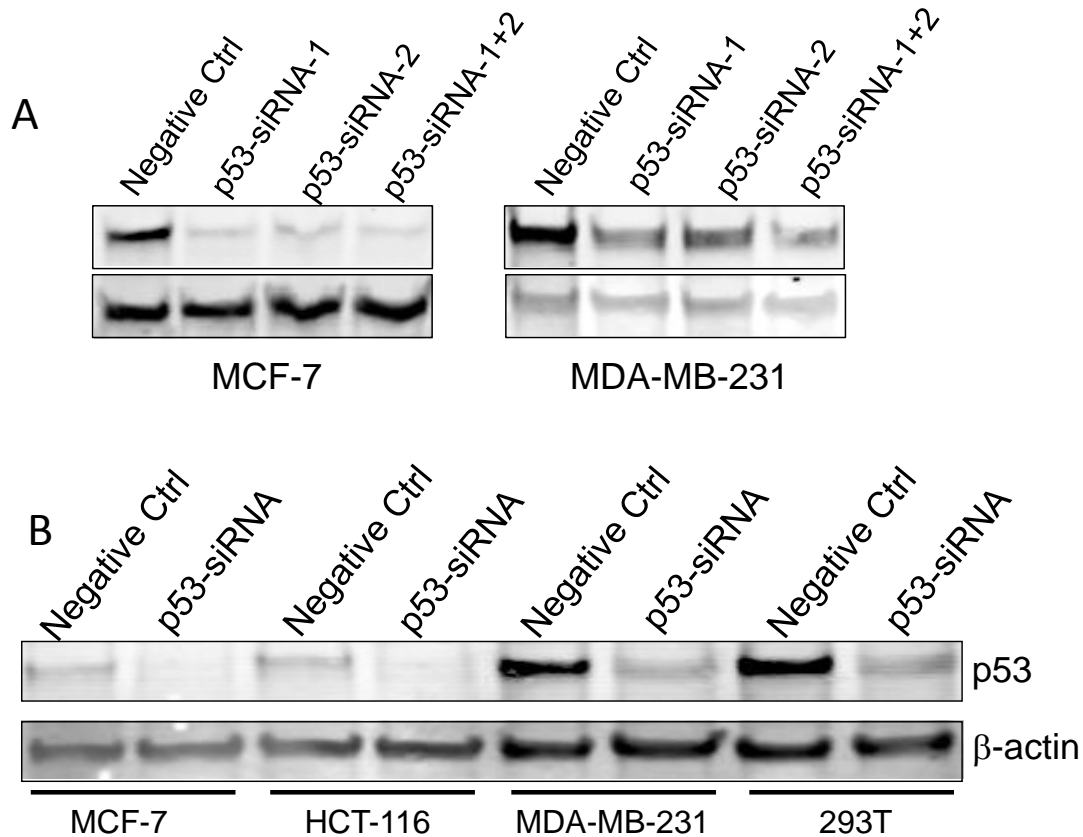

S-Fig. 2 Suppression of p53 by RNAi. Cells were transfected with negative control or p53 siRNAs and were harvested for western 24 h later.

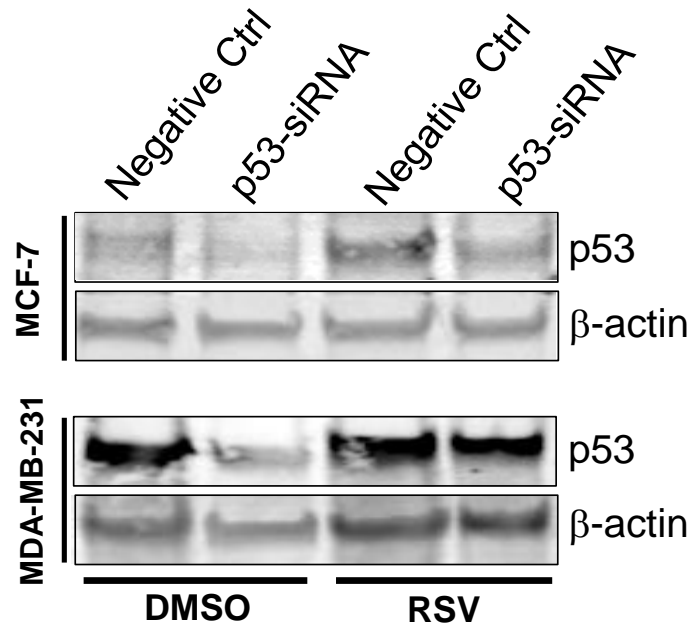

S-Fig. 3 Suppression of p53 by RNAi in the absence or presence of RSV in MCF-7 and MDA-MB-231 cells. Cells were treated with RSV at 30 (MDA-MB-231) or 100  $\mu$ M (MCF-7) for 24 h before harvesting for western.

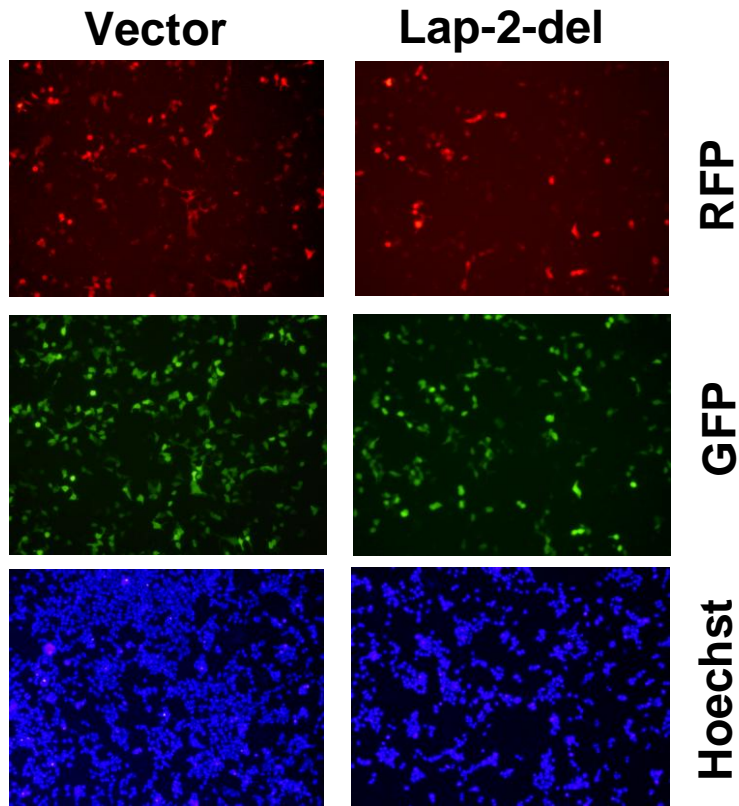

S-Fig. 4 Deletion of both DNA binding and dimerization domains abolishes the ability of C/EBP- $\beta$  to suppress the miR-145 promoter activity, as detected by the GFP-miR-145 promoter reporter

## s-Table 1, Primers used in this study

### To clone cDNAs

CEBPB-Myc-R1-5.1;  
5' -CCATGGAGGCCCGAATTCTGCAACGCCTGGTGGCCTGGG  
CEBPB-Myc-pCDH-Not1-3.1;  
5' -TCGCAGATCCTTGCGGCCGCTAGCAGTGGCCGGAGGAGG  
C-FOS-Myc-R1-5.1;  
5' -CCATGGAGGCCCGAATTCTGTTCTCGGGCTTCAACGCAG  
C-FOS- pCDH-Not1-3.1;  
5' -TCGCAGATCCTTGCGGCCGCTCACAGGGCCAGCAGCGTGG  
C-JUN-Myc-R1-5.1;  
5' -CCATGGAGGCCCGAATTCTGACTGCAAAGATGGAACG  
C-JUN-pCDH-Not1-3.1;  
5' -TCGCAGATCCTTGCGGCCGCTCAAATGTTTGCAACTGCTG  
LAP2-IRES-RED-5.1;  
5' -CCTCCTCCGGCCACTGCTAGCCCGGGTAAATTCGCCCCCC  
LAP2-Myc-R1-5.1;  
5' -CCATGGAGGCCCGAATTCTGGAAGTGGCCAACCTTCTACTAC  
LIP-Myc-R1-5.1;  
5' -CCATGGAGGCCCGAATTCTGGCGGCGGGCTTCCCGTACGC  
LAP2-IRES-RED-3.1;  
5' -GGGGGGCGGAATTTACCCGGGCTAGCAGTGGCCGGAGGAGG  
p53-Myc-R1-5.1;  
5' -CCATGGAGGCCCGAATTCTGGAGGAGCCGCAGTCAGATCC  
p53-IRES-RED-3.1;  
5' - GGGGGGCGGAATTTACCCGGGTCAGTCTGAGTCAGGCCCTTC  
CEBP-RED-NOT1-3.5;  
5' -ATTGTGCGACTCAGCGGCCGCGCATCTTGGCCTTGTCGCG  
CEBP-RED-NOT1-3.6;  
5' -ATTGTGCGACTCAGCGGCCGCTCTTGCGCACGGCGATGTTG

### To clone miR-145 promoter

Mir-145p-Cla1-5.1;  
5' -ATCGATAGCACTGTAGCTCAGGAAGAG  
Mir-145p-BamH1-3.2;  
5' -GGATCCTGGATTTAAACCAACCATTCA  
miR-145p-CEPBm-5.1;  
5' -TCCTCCCAGGGTCAAATGCGTCTCGTGCCTCAGCCTCCCA  
miR-145p-CEPBm-3.1;  
5' -GGCTGAGGCACGAGACGCATTTGACCCTGGGAGGAGGAGG

### For ChIP assays

Mir145-CHIP-5.3;  
5' -TGGGGAAGTTCCTCTACACAAG  
Mir145-CHIP-3.3;

5' -AGAAAGAGAAAGCAGAGGCAG  
Mir145-CHIP-5.4;  
5' -ATAATCTCAGCTCACTGCAA  
Mir145-CHIP-3.4;  
5' -AGGTGTGGTGGCGCACACT
